# Supplementary material
Source: PubMed Central journal article supplement (PMC7872080)
Supplement: NIHMS1595843-supplement-1595843_Supp_Tab2.pdf [file NIHMS1595843-supplement-1595843_Supp_Tab2.pdf]

| Sample identification                           | HILO                       | wHILO      | HISLETS    |
|-------------------------------------------------|----------------------------|------------|------------|
| Estimated Number of Cells                       | 4,078                      | 4,840      | 3,245      |
| Fraction Reads in Cells                         | 88.90%                     | 89.20%     | 79.70%     |
| Mean Reads per Cell                             | 16,482                     | 13,496     | 22,195     |
| Median Genes per Cell                           | 1,582                      | 1,455      | 1,486      |
| Total Genes Detected                            | 22,003                     | 22,076     | 21,007     |
| Median UMI Counts per Cell                      | 4,754                      | 4,220      | 5,618      |
| Number of Reads                                 | 67,216,051                 | 65,324,121 | 72,025,806 |
| Valid Barcodes                                  | 98.50%                     | 98.50%     | 98.60%     |
| Reads Mapped Confidently to Transcriptome       | 58.30%                     | 58.10%     | 64.40%     |
| Reads Mapped Confidently to Exonic Reagions     | 62.20%                     | 62.00%     | 68.10%     |
| Reads Mapped Confidently to Intergenic Reagions | 24%                        | 23.70%     | 19.00%     |
| Reads Mapped Confidently to Intergenic Reagions | 4.70%                      | 4.70%      | 4.20%      |
| Reads Mapped Antisense to Gene                  | 4.10%                      | 4.00%      | 4.40%      |
| Sequencing Saturation                           | 32.30%                     | 27.00%     | 38.60%     |
| Q30 Bases in Barcode                            | 96.80%                     | 96.80%     | 96.80%     |
| Q30 Bases in RNA Read                           | 80.50%                     | 79.40%     | 80.40%     |
| Q30 Bases in UMI                                | 96.40%                     | 96.40%     | 96.40%     |
| Genomic Modification                            | CRISPR-InsulinGFP Reporter |            | None       |
| Transcriptome                                   | GRCh38                     |            |            |
| Chemistry                                       | Single Cell 3' v2          |            |            |
| Cell Ranger Version                             | 2.0.2                      |            |            |
