# Supplementary material
Source: PubMed Central journal article supplement (PMC7872080)
Supplement: NIHMS1595843-supplement-1595843_Supp_Tab5.pdf [file NIHMS1595843-supplement-1595843_Supp_Tab5.pdf]

Extended Data Fig.2d

| Gene  | Ident | Cell (n) | Min.   | 1st Qu. | Median | Mean   | 3rd Qu. | Max.   |
|-------|-------|----------|--------|---------|--------|--------|---------|--------|
| WNT2B | 0     | 69       | 0.5245 | 0.8985  | 1.0685 | 1.1181 | 1.3451  | 1.7448 |
|       | 1     | 8        | 0.7082 | 0.7536  | 0.8007 | 0.8386 | 0.9429  | 1.006  |
|       | 2     | 6        | 0.6103 | 0.9185  | 1.0486 | 1.0201 | 1.0848  | 1.4412 |
|       | 3     | 11       | 0.6465 | 0.8251  | 1.0647 | 1.0544 | 1.2658  | 1.4658 |
|       | 4     | 9        | 0.7566 | 0.9825  | 1.0369 | 1.108  | 1.2895  | 1.5545 |
|       | 5     | 5        | 0.3541 | 0.6019  | 0.7529 | 0.8781 | 1.2683  | 1.4133 |
|       | 6     | 6        | 0.6314 | 0.7617  | 0.8399 | 0.882  | 1.0165  | 1.1696 |
|       | 7     | 8        | 0.3417 | 0.4088  | 0.4495 | 0.4477 | 0.4705  | 0.5667 |
| 8     | 0     | 0        | 0      | 0       | 0      | 0      | 0       |        |
| WNT4  | 0     | 248      | 0.535  | 0.955   | 1.134  | 1.166  | 1.349   | 2.193  |
|       | 1     | 194      | 0.538  | 0.8205  | 0.981  | 1.0079 | 1.134   | 1.9563 |
|       | 2     | 84       | 0.6917 | 0.9362  | 1.1067 | 1.1527 | 1.3106  | 2.1204 |
|       | 3     | 69       | 0.5317 | 0.9546  | 1.142  | 1.206  | 1.3693  | 2.5064 |
|       | 4     | 14       | 0.7679 | 0.9015  | 0.9798 | 1.0168 | 1.1498  | 1.3438 |
|       | 5     | 8        | 0.4764 | 0.5457  | 0.6676 | 0.8371 | 0.9163  | 1.6781 |
|       | 6     | 6        | 0.6464 | 0.794   | 0.956  | 1.0694 | 1.3869  | 1.5876 |
|       | 7     | 120      | 0.2702 | 0.502   | 0.6451 | 0.6746 | 0.8249  | 1.4351 |
| 8     | 1     | 0.5101   | 0.5101 | 0.5101  | 0.5101 | 0.5101 | 0.5101  |        |
| WNT5A | 0     | 3        | 1.031  | 1.091   | 1.152  | 1.161  | 1.226   | 1.299  |
|       | 1     | 0        | 0      | 0       | 0      | 0      | 0       | 0      |
|       | 2     | 0        | 0      | 0       | 0      | 0      | 0       | 0      |
|       | 3     | 0        | 0      | 0       | 0      | 0      | 0       | 0      |
|       | 4     | 0        | 0      | 0       | 0      | 0      | 0       | 0      |
|       | 5     | 0        | 0      | 0       | 0      | 0      | 0       | 0      |
|       | 6     | 51       | 0.3838 | 0.6653  | 0.8206 | 0.9704 | 1.2839  | 2.1432 |
|       | 7     | 0        | 0      | 0       | 0      | 0      | 0       | 0      |
| 8     | 0     | 0        | 0      | 0       | 0      | 0      | 0       |        |
| WNT7A | 0     | 0        | 0      | 0       | 0      | 0      | 0       | 0      |
|       | 1     | 0        | 0      | 0       | 0      | 0      | 0       | 0      |
|       | 2     | 0        | 0      | 0       | 0      | 0      | 0       | 0      |
|       | 3     | 0        | 0      | 0       | 0      | 0      | 0       | 0      |
|       | 4     | 5        | 0.3655 | 0.9408  | 1.0338 | 0.9664 | 1.1498  | 1.3419 |
|       | 5     | 20       | 0.1977 | 0.5841  | 0.7371 | 0.8416 | 1.1974  | 1.564  |
|       | 6     | 0        | 0      | 0       | 0      | 0      | 0       | 0      |
|       | 7     | 0        | 0      | 0       | 0      | 0      | 0       | 0      |
| 8     | 0     | 0        | 0      | 0       | 0      | 0      | 0       |        |
| WNT7B | 0     | 0        | 0      | 0       | 0      | 0      | 0       | 0      |
|       | 1     | 0        | 0      | 0       | 0      | 0      | 0       | 0      |
|       | 2     | 0        | 0      | 0       | 0      | 0      | 0       | 0      |
|       | 3     | 0        | 0      | 0       | 0      | 0      | 0       | 0      |
|       | 4     | 8        | 0.6195 | 0.6492  | 0.7793 | 0.8143 | 0.9217  | 1.1281 |
|       | 5     | 43       | 0.1977 | 0.497   | 0.7003 | 0.8842 | 1.2333  | 2.1337 |
|       | 6     | 1        | 0.7421 | 0.7421  | 0.7421 | 0.7421 | 0.7421  | 0.7421 |
|       | 7     | 0        | 0      | 0       | 0      | 0      | 0       | 0      |
| 8     | 0     | 0        | 0      | 0       | 0      | 0      | 0       |        |
| WNT9A | 0     | 0        | 0      | 0       | 0      | 0      | 0       | 0      |
|       | 1     | 5        | 0.8761 | 1.0761  | 1.0785 | 1.1073 | 1.2432  | 1.2627 |
|       | 2     | 1        | 0.6682 | 0.914   | 0.9827 | 0.9723 | 1.1027  | 1.1667 |
|       | 3     | 2        | 0.7648 | 0.8556  | 0.9463 | 0.9463 | 1.0371  | 1.1278 |
|       | 4     | 2        | 0.7376 | 0.8387  | 0.9398 | 0.9398 | 1.0409  | 1.142  |
|       | 5     | 1        | 1.009  | 1.009   | 1.009  | 1.009  | 1.009   | 1.009  |
|       | 6     | 2        | 0.2375 | 0.5839  | 0.6872 | 0.7234 | 0.9285  | 1.1699 |
|       | 7     | 10       | 0.868  | 0.8796  | 0.8911 | 0.8911 | 0.9026  | 0.9142 |
| 8     | 0     | 0.333    | 0.3714 | 0.4995  | 0.4612 | 0.5288 | 0.5506  |        |
| 8     | 0     | 0        | 0      | 0       | 0      | 0      | 0       |        |

Extended Data Fig.8b

| Gene  | Ident  | Cell (n) | Min.      | 1st Qu.   | Median    | Mean      | 3rd Qu.   | Max.      |
|-------|--------|----------|-----------|-----------|-----------|-----------|-----------|-----------|
| INS   | 0      | 785      | 0.2575    | 0.4873    | 0.5703    | 0.5845    | 0.6591    | 1.1499    |
|       | 1      | 624      | 0.0002706 | 0.0169494 | 0.0312581 | 0.0432049 | 0.0500204 | 0.4859418 |
|       | 2      | 593      | 0.01534   | 0.0873    | 0.11661   | 0.11958   | 0.1494    | 0.31717   |
|       | 3      | 547      | 0.1627    | 0.2939    | 0.4059    | 0.5226    | 0.6509    | 1.5375    |
|       | 4      | 487      | 0.08296   | 0.15734   | 0.18438   | 0.17892   | 0.20661   | 0.25873   |
|       | 5      | 459      | 0.1204    | 0.1994    | 0.2158    | 0.2422    | 0.2325    | 0.9502    |
|       | 6      | 409      | 0.8024    | 1.196     | 1.3771    | 1.3878    | 1.5934    | 1.8406    |
|       | 7      | 369      | 0.3011    | 0.6223    | 0.8841    | 0.8867    | 1.2553    | 1.7486    |
|       | 8      | 127      | 0.004717  | 0.040529  | 0.055331  | 0.100013  | 0.120609  | 0.578356  |
|       | 9      | 39       | 0.001774  | 0.013309  | 0.030673  | 0.055519  | 0.075517  | 0.259472  |
| 10    | 40     | 0.4983   | 0.8094    | 0.8612    | 0.8729    | 0.9128    | 1.1462    |           |
| CHGA  | 0      | 785      | 2.113     | 2.502     | 2.618     | 2.608     | 2.736     | 2.901     |
|       | 1      | 720      | 0.2214    | 0.3478    | 0.3831    | 0.427     | 0.4475    | 1.3078    |
|       | 2      | 593      | 0.1683    | 0.3331    | 0.3681    | 0.3887    | 0.4179    | 0.8767    |
|       | 3      | 547      | 2.001     | 2.319     | 2.37      | 2.375     | 2.431     | 2.617     |
|       | 4      | 487      | 0.211     | 0.3747    | 0.4278    | 0.4317    | 0.4768    | 0.9875    |
|       | 5      | 459      | 0.2878    | 0.4087    | 0.4802    | 0.7113    | 0.7671    | 2.0679    |
|       | 6      | 409      | 2.139     | 2.317     | 2.383     | 2.38      | 2.444     | 2.627     |
|       | 7      | 369      | 1.347     | 2.042     | 2.175     | 2.159     | 2.304     | 2.573     |
|       | 8      | 225      | 0.001233  | 0.154088  | 0.254935  | 0.319567  | 0.409153  | 1.380105  |
|       | 9      | 94       | 0.1194    | 0.2558    | 0.3425    | 0.3817    | 0.4635    | 1.109     |
| 10    | 40     | 1.852    | 2.02      | 2.079     | 2.058     | 2.122     | 2.22      |           |
| SOX9  | 0      | 785      | 0.03853   | 0.07017   | 0.1364    | 0.13213   | 0.15964   | 0.25961   |
|       | 1      | 720      | 0.3036    | 0.4808    | 0.5229    | 0.5152    | 0.5545    | 0.6107    |
|       | 2      | 593      | 0.2745    | 0.3819    | 0.42      | 0.4192    | 0.4572    | 0.5463    |
|       | 3      | 547      | 0.03369   | 0.05192   | 0.06474   | 0.07293   | 0.08583   | 0.21985   |
|       | 4      | 487      | 0.3108    | 0.402     | 0.4301    | 0.4272    | 0.4615    | 0.5147    |
|       | 5      | 459      | 0.1471    | 0.3239    | 0.3481    | 0.3396    | 0.3735    | 0.439     |
|       | 6      | 409      | 0.01164   | 0.03968   | 0.0531    | 0.05532   | 0.07025   | 0.11813   |
|       | 7      | 369      | 0.01842   | 0.06714   | 0.09408   | 0.09198   | 0.11229   | 0.23876   |
|       | 8      | 306      | 0.1502    | 0.1919    | 0.2511    | 0.2855    | 0.343     | 0.5658    |
|       | 9      | 94       | 0.2472    | 0.3281    | 0.3507    | 0.3494    | 0.3736    | 0.4182    |
| 10    | 40     | 0.002919 | 0.024805  | 0.038584  | 0.050055  | 0.068438  | 0.178219  |           |
| HES1  | 0      | 785      | 0.04675   | 0.07913   | 0.08746   | 0.0943    | 0.10182   | 0.33816   |
|       | 1      | 720      | 0.4456    | 0.5484    | 0.5796    | 0.5784    | 0.6096    | 0.7311    |
|       | 2      | 593      | 0.4925    | 0.566     | 0.5992    | 0.6012    | 0.6354    | 0.7249    |
|       | 3      | 547      | 0.03884   | 0.07427   | 0.08049   | 0.08951   | 0.09192   | 0.31327   |
|       | 4      | 487      | 0.4937    | 0.5258    | 0.5453    | 0.5475    | 0.564     | 0.6476    |
|       | 5      | 459      | 0.2448    | 0.5419    | 0.5783    | 0.558     | 0.6046    | 0.6703    |
|       | 6      | 408      | 0.003468  | 0.039604  | 0.060793  | 0.057612  | 0.074333  | 0.143458  |
|       | 7      | 325      | 0.0002844 | 0.0269683 | 0.0498034 | 0.0582438 | 0.0694238 | 0.2943636 |
|       | 8      | 306      | 0.0593    | 0.09468   | 0.13713   | 0.19717   | 0.26942   | 0.51035   |
|       | 9      | 94       | 0.5244    | 0.6414    | 0.6728    | 0.6693    | 0.713     | 0.7601    |
| 10    | 40     | 0.1425   | 0.1764    | 0.2077    | 0.216     | 0.2448    | 0.393     |           |
| ESRRG | HILOs  | 38       | 0.1       | 0.14      | 0.9       | 0.9       | 1.6       |           |
|       | wHILOs | 9        | 0.5       | 1.15      | 1.22      | 1.56      | 1.6       |           |
|       | NDUFV3 | 38       | -0.31     | -0.01     | 0.49      | 1         | 2.2       |           |
|       | wHILOs | 9        | 1.21      | 1.33      | 1.67      | 1.98      | 2.14      |           |
|       | HILOs  | 38       | 0.05      | 0.5       | 1.35      | 1.9       | 3.53      |           |
|       | wHILOs | 9        | 1.02      | 1.21      | 1.33      | 1.44      | 1.67      |           |
| LDHA  | HILOs  | 38       | 0.05      | 0.5       | 1.35      | 1.9       | 3.53      |           |
|       | wHILOs | 9        | 1.02      | 1.21      | 1.33      | 1.44      | 1.67      |           |
